# Supplementary material for: Effective Dose Range of Intrathecal Isobaric Bupivacaine to Achieve T5–T10 Sensory Block Heights for Elderly and Overweight Patients: An Observational Study
Source: MDPI journal article supplement (doi:10.3390/medicina59030484), 2023-03-01
Supplement: s1 [file s1]

## SUPPLEMENTARY FIGURES AND TABLES

### Effective Dose of Intrathecal Isobaric Bupivacaine to Achieve T5-T10 Block Height for Aged and Overweight Patients

#### TITLES OF FIGURES

**Supplementary Figure S1** — Discriminative ability based on the area under the receiver operating characteristics curves (a-c) and calibration plots (d-f) for the polytomous logistic model in patients aged less than 60 years old with body mass index less than 25 kg/m<sup>2</sup> (Category 1).

**Supplementary Figure S2** — Discriminative ability based on the area under the receiver operating characteristics curves (a-c) and calibration plots (d-f) for the polytomous logistic model in patients aged less than 60 years old with body mass index more than or equal to 25 kg/m<sup>2</sup> (Category 2).

**Supplementary Figure S3** — Discriminative ability based on the area under the receiver operating characteristics curves (a-c) and calibration plots (d-f) for the polytomous logistic model in patients aged more than or equal to 60 years old with body mass index less than 25 kg/m<sup>2</sup> (Category 3).

**Supplementary Figure S4** — Discriminative ability based on the area under the receiver operating characteristics curves (a-c) and calibration plots (d-f) for the polytomous logistic model in patients aged more than or equal to 60 years old with body mass index more than or equal to 25 kg/m<sup>2</sup> (Category 4).

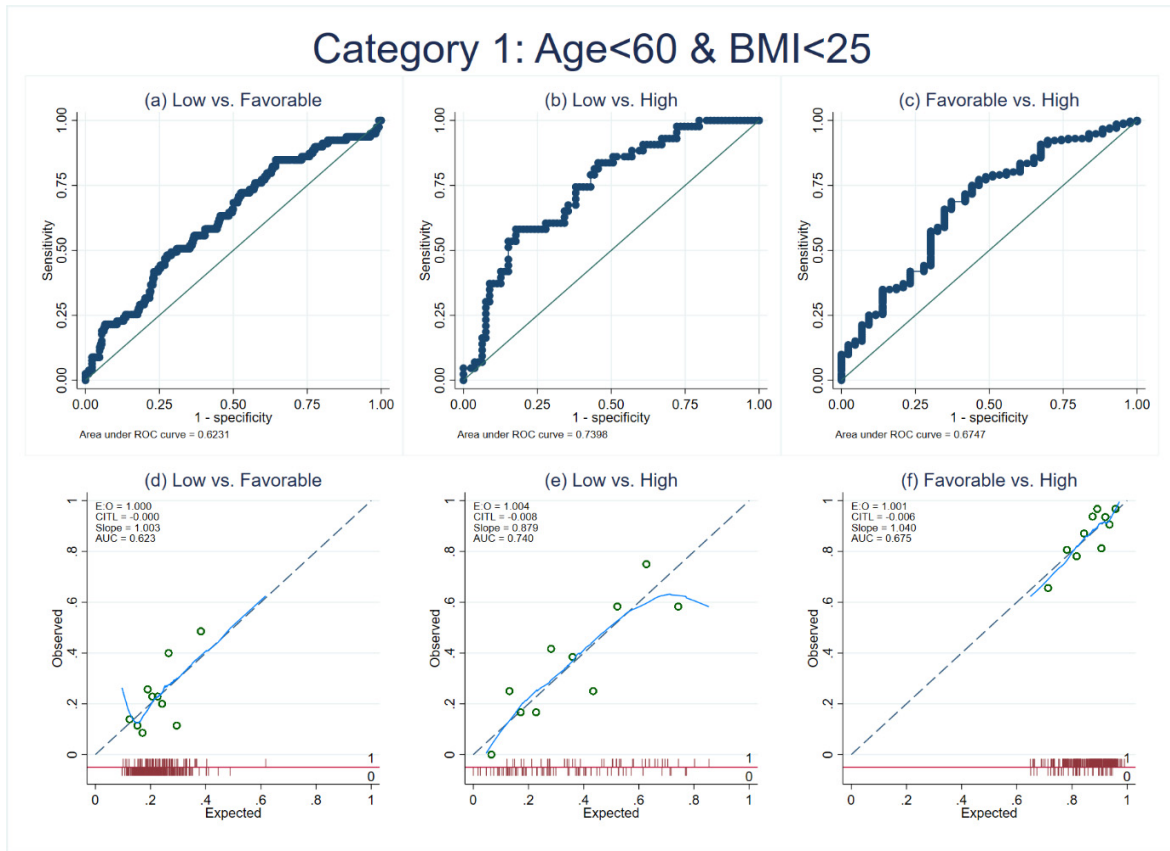

**Supplementary Figure S1** — Discriminative ability based on the area under the receiver operating characteristics curves (a-c) and calibration plots (d-f) for the polytomous logistic model in patients aged less than 60 years old with body mass index less than 25 kg/m<sup>2</sup> (Category 1).

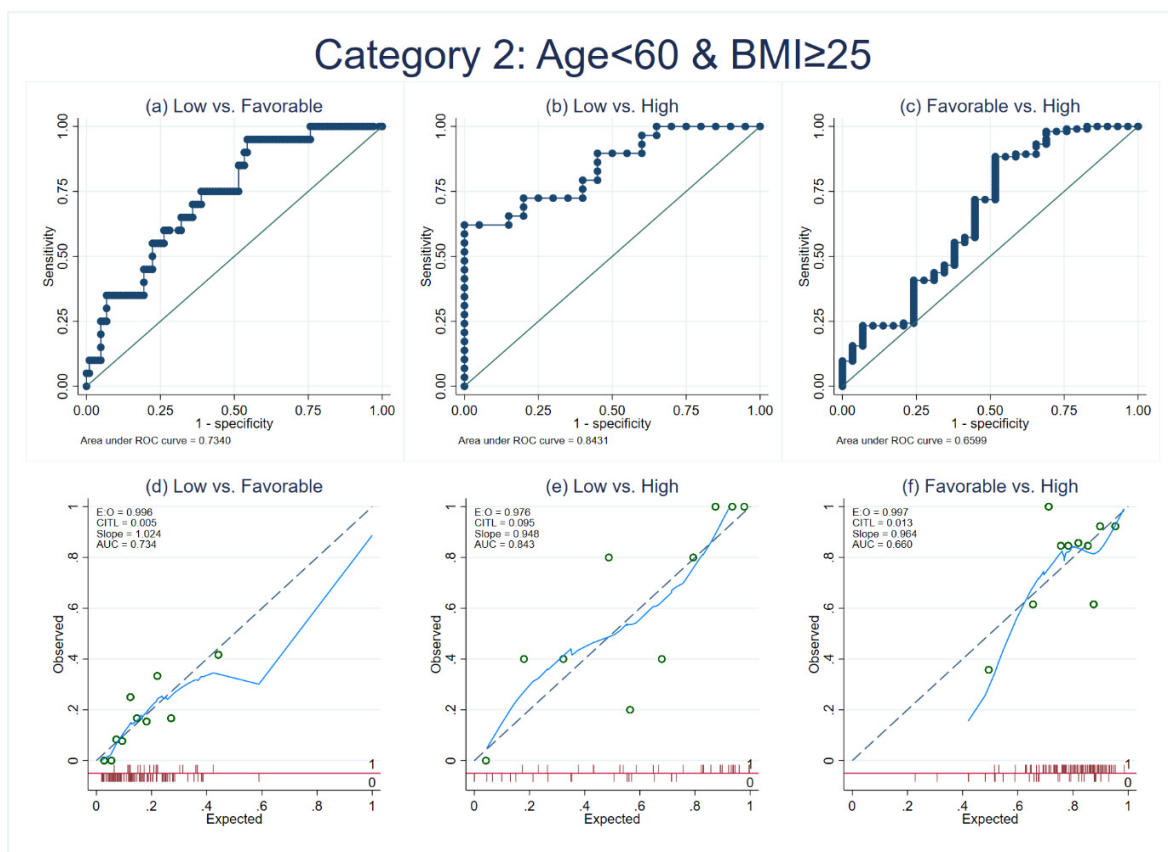

**Supplementary Figure S2** — Discriminative ability based on the area under the receiver operating characteristics curves (a-c) and calibration plots (d-f) for the polytomous logistic model in patients aged less than 60 years old with body mass index more than or equal to 25 kg/m<sup>2</sup> (Category 2).

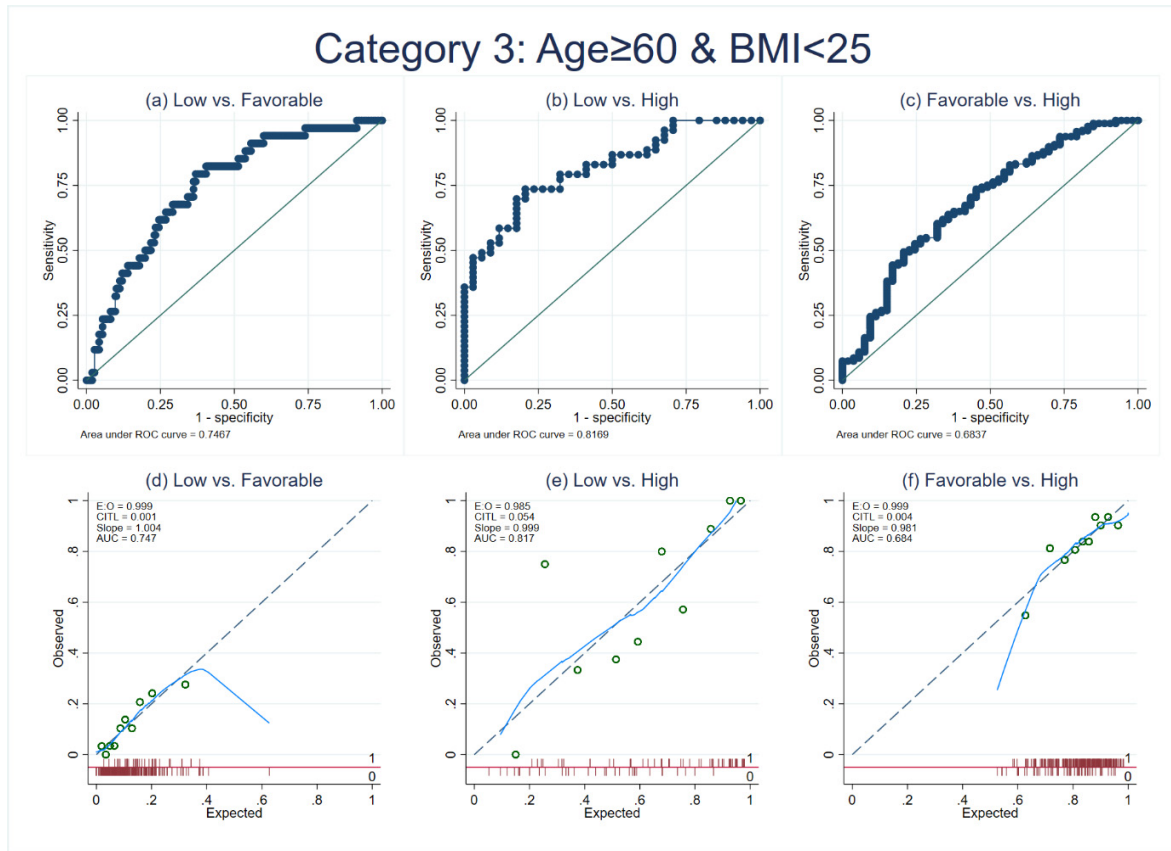

**Supplementary Figure S3** — Discriminative ability based on the area under the receiver operating characteristics curves (a-c) and calibration plots (d-f) for the polytomous logistic model in patients aged more than or equal to 60 years old with body mass index less than 25 kg/m<sup>2</sup> (Category 3).

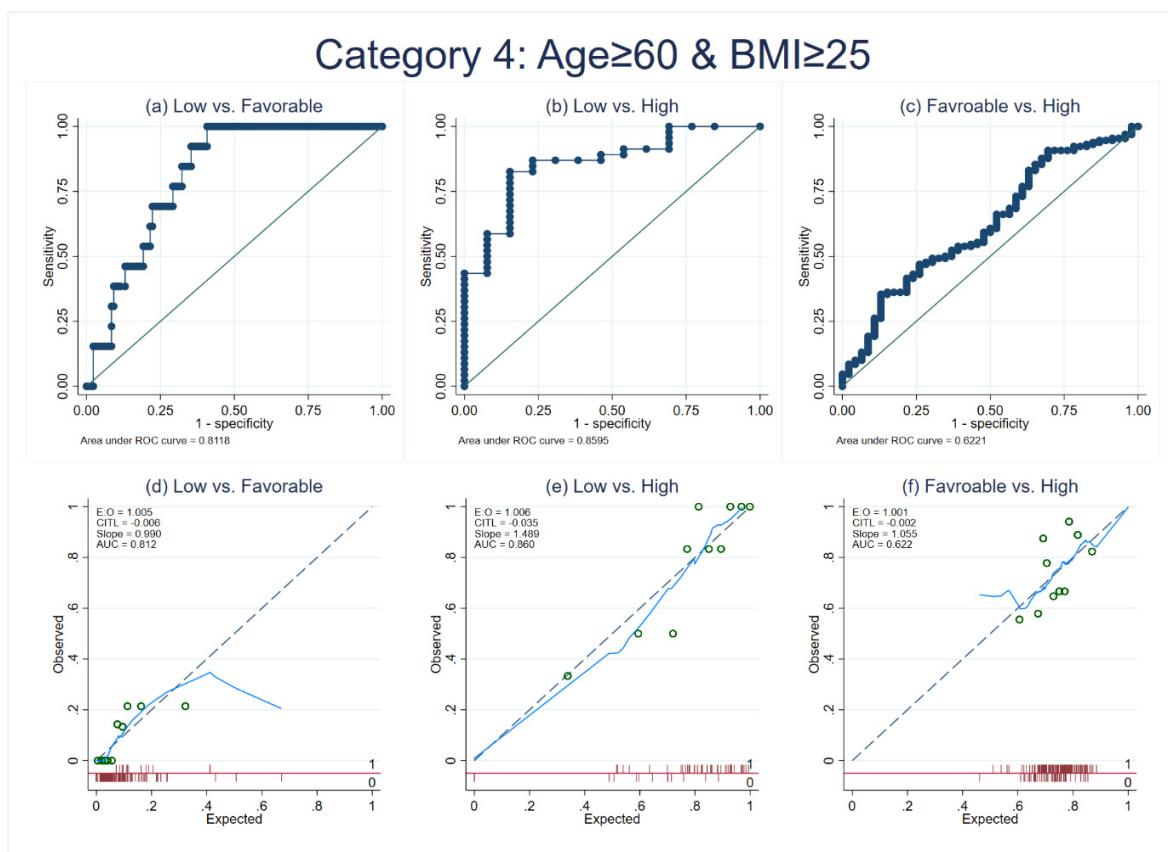

**Supplementary Figure S4** — Discriminative ability based on the area under the receiver operating characteristics curves (a-c) and calibration plots (d-f) for the polytomous logistic model in patients aged more than or equal to 60 years old with body mass index more than or equal to 25 kg/m<sup>2</sup> (Category 4).

**TABLES**

**Supplementary Table S1** — Multivariable polytomous logistic regression model in patients aged less than 60 years old with body mass index less than 25 kg/m<sup>2</sup> (Category 1).

**Supplementary Table S2** — Multivariable polytomous logistic regression model in patients aged less than 60 years old with body mass index more than or equal to 25 kg/m<sup>2</sup> (Category 2).

**Supplementary Table S3** — Multivariable polytomous logistic regression model in patients aged more than or equal to 60 years old with body mass index less than 25 kg/m<sup>2</sup> (Category 3).

**Supplementary Table S4** — Multivariable polytomous logistic regression model patients aged more than or equal to 60 years old with body mass index more than or equal to 25 kg/m<sup>2</sup> (Category 4).

**Supplementary Table S1** — Multivariable polytomous logistic regression model in patients aged less than 60 years old with body mass index less than 25 kg/m<sup>2</sup> (Category 1).

| Predictors                                        | Beta coefficient | 95% confidence interval | P-value |
|---------------------------------------------------|------------------|-------------------------|---------|
| <b>Lower sensory block level</b>                  |                  |                         |         |
| Isobaric bupivacaine dose<br>(Each 1-mg increase) | -0.1076047       | -0.2240038, 0.0087944   | 0.070   |
| Male sex                                          | 0.0536703        | -0.5959009, 0.7032415   | 0.871   |
| Age of the patient<br>(Each 1-year increase)      | -0.0127394       | -0.0316219, 0.006143    | 0.186   |
| Height<br>(Each 1-cm increase)                    | 0.0020543        | -0.0447476, 0.0488562   | 0.931   |
| Weight<br>(Each 1-kg increase)                    | 0.0263514        | -0.015996, 0.0686989    | 0.223   |
| Injection level                                   |                  |                         |         |
| L2-L3                                             | Reference        |                         |         |
| L3-L4                                             | -0.6308244       | -1.802002, 0.5403528    | 0.291   |
| L4-L5                                             | -0.5783501       | -1.808458, 0.6517575    | 0.357   |
| L5-S1                                             | 14.16603         | -1699.995, 1728.327     | 0.987   |
| Constant (intercept)                              | -0.2122009       | -7.491522, 7.06712      | 0.954   |
| <b>Favorable sensory block level</b>              |                  |                         |         |
|                                                   | (Base outcome)   |                         |         |
| <b>Higher sensory block level</b>                 |                  |                         |         |
| Isobaric bupivacaine dose<br>(Each 1-mg increase) | 0.2804427        | 0.1149919, 0.4458935    | 0.001   |
| Male sex                                          | -0.4363014       | -1.266455, 0.3938524    | 0.303   |
| Age of the patient<br>(Each 1-year increase)      | 0.008804         | -0.0144479, 0.0320559   | 0.458   |
| Height<br>(Each 1-cm increase)                    | -0.0154071       | -0.0801769, 0.0493627   | 0.641   |
| Weight<br>(Each 1-kg increase)                    | 0.0175183        | -0.0408801, 0.0759167   | 0.557   |
| Injection level                                   |                  |                         |         |
| L2-L3                                             | Reference        |                         |         |
| L3-L4                                             | 0.180821         | -1.958781, 2.320423     | 0.868   |
| L4-L5                                             | 0.4450736        | -1.742352, 2.6325       | 0.690   |
| L5-S1                                             | -0.0286841       | -4639.541, 4639.484     | 1.000   |
| Constant (intercept)                              | -6.437252        | -16.40996, 3.535454     | 0.206   |

**Supplementary Table S2** — Multivariable polytomous logistic regression model in patients aged less than 60 years old with body mass index more than or equal to 25 kg/m<sup>2</sup> (Category 2).

| Predictors                                        | Beta coefficient | 95% confidence interval | P-value |
|---------------------------------------------------|------------------|-------------------------|---------|
| <b>Lower sensory block level</b>                  |                  |                         |         |
| Isobaric bupivacaine dose<br>(Each 1-mg increase) | -0.237644        | -0.4809599, 0.0056719   | 0.056   |
| Male sex                                          | 0.9469826        | -0.4154881, 2.309453    | 0.173   |
| Age of the patient<br>(Each 1-year increase)      | -0.0389472       | -0.0882352, 0.0103408   | 0.121   |
| Height<br>(Each 1-cm increase)                    | -0.0392374       | -0.140525, 0.0620501    | 0.448   |
| Weight<br>(Each 1-kg increase)                    | -0.0439194       | -0.1284941, 0.0406554   | 0.309   |
| Injection level                                   |                  |                         |         |
| L2-L3                                             | Reference        |                         |         |
| L3-L4                                             | -0.5716221       | -3.374747, 2.231503     | 0.689   |
| L4-L5                                             | -0.3214876       | -3.261515, 2.61854      | 0.830   |
| L5-S1                                             | 20.35857         | -36462.35, 36503.06     | 0.999   |
| Constant (intercept)                              | 15.22241         | -1.16929, 31.61412      | 0.080   |
| <b>Favorable sensory block level</b>              |                  |                         |         |
|                                                   | (Base outcome)   |                         |         |
| <b>Higher sensory block level</b>                 |                  |                         |         |
| Isobaric bupivacaine dose<br>(Each 1-mg increase) | 0.3250955        | 0.0826547, 0.5675362    | 0.009   |
| Male sex                                          | -0.2471345       | -1.408985, 0.9147157    | 0.677   |
| Age of the patient<br>(Each 1-year increase)      | 0.0095255        | -0.0270956, 0.0461465   | 0.610   |
| Height<br>(Each 1-cm increase)                    | -0.0620276       | -0.1373253, 0.0132702   | 0.106   |
| Weight<br>(Each 1-kg increase)                    | 0.0483253        | -0.0065498, 0.1032004   | 0.084   |
| Injection level                                   |                  |                         |         |
| L2-L3                                             | Reference        |                         |         |
| L3-L4                                             | 14.65271         | -1894.947, 1924.252     | 0.988   |
| L4-L5                                             | 14.63849         | -1894.961, 1924.238     | 0.988   |
| L5-S1                                             | 15.0252          | -77843.41, 77873.46     | 1.000   |
| Constant (intercept)                              | -15.95827        | -1925.597, 1893.681     | 0.987   |



**Supplementary Table S3** — Multivariable polytomous logistic regression model in patients aged more than or equal to 60 years old with body mass index less than 25 kg/m<sup>2</sup> (Category 3).

| Predictors                                        | Beta coefficient | 95% confidence interval | P-value |
|---------------------------------------------------|------------------|-------------------------|---------|
| <b>Lower sensory block level</b>                  |                  |                         |         |
| Isobaric bupivacaine dose<br>(Each 1-mg increase) | -0.1493778       | -0.3254235, 0.0266679   | 0.096   |
| Male sex                                          | -0.0294145       | -0.9073335, 0.8485045   | 0.948   |
| Age of the patient<br>(Each 1-year increase)      | -0.061157        | -0.1105168, -0.0117972  | 0.015   |
| Height<br>(Each 1-cm increase)                    | 0.0931226        | 0.0230627, 0.1631825    | 0.009   |
| Weight<br>(Each 1-kg increase)                    | -0.0178304       | -0.0737118, 0.0380511   | 0.532   |
| Injection level                                   |                  |                         |         |
| L2-L3                                             | Reference        |                         |         |
| L3-L4                                             | -0.0886829       | -1.828916, 1.651551     | 0.920   |
| L4-L5                                             | -0.1425914       | -1.945926, 1.660743     | 0.877   |
| L5-S1                                             | -14.77973        | -3197.059, 3167.5       | 0.993   |
| Constant (intercept)                              | -9.150924        | -19.257, 0.9551479      | 0.076   |
| <b>Favorable sensory block level</b>              |                  |                         |         |
|                                                   | (Base outcome)   |                         |         |
| <b>Higher sensory block level</b>                 |                  |                         |         |
| Isobaric bupivacaine dose<br>(Each 1-mg increase) | 0.1535893        | 0.0164925, 0.2906861    | 0.028   |
| Male sex                                          | -0.661633        | -1.477977, 0.1547112    | 0.112   |
| Age of the patient<br>(Each 1-year increase)      | 0.0108957        | -0.025998, 0.0477895    | 0.563   |
| Height<br>(Each 1-cm increase)                    | -0.0803621       | -0.1425656, -0.0181586  | 0.011   |
| Weight<br>(Each 1-kg increase)                    | 0.078512         | 0.0194528, 0.1375713    | 0.009   |
| Injection level                                   |                  |                         |         |
| L2-L3                                             | Reference        |                         |         |
| L3-L4                                             | 0.0403298        | -1.552061, 1.632721     | 0.960   |
| L4-L5                                             | 0.178146         | -1.469807, 1.826099     | 0.832   |
| L5-S1                                             | -14.32359        | -2837.696, 2809.049     | 0.992   |
| Constant (intercept)                              | 3.655893         | -4.806349, 12.11813     | 0.397   |

**Supplementary Table S4** — Multivariable polytomous logistic regression model patients aged more than or equal to 60 years old with body mass index more than or equal to 25 kg/m<sup>2</sup> (Category 4).

| Predictors                                        | Beta coefficient | 95% confidence interval |          | P-value |
|---------------------------------------------------|------------------|-------------------------|----------|---------|
| <b>Lower sensory block level</b>                  |                  |                         |          |         |
| Isobaric bupivacaine dose<br>(Each 1-mg increase) | -.127783         | -.4601431               | .2045771 | 0.451   |
| Male sex                                          | -.1399346        | -1.720711               | 1.440842 | 0.862   |
| Age of the patient<br>(Each 1-year increase)      | -.0301321        | -.1243892               | .064125  | 0.531   |
| Height<br>(Each 1-cm increase)                    | .1460785         | -.0008254               | .2929824 | 0.051   |
| Weight<br>(Each 1-kg increase)                    | -.1001937        | -.2402288               | .0398414 | 0.161   |
| Injection level                                   |                  |                         |          |         |
| L2-L3                                             | Reference        |                         |          |         |
| L3-L4                                             | 12.87662         | -1377.775               | 1403.528 | 0.986   |
| L4-L5                                             | 11.79574         | -1378.857               | 1402.449 | 0.987   |
| L5-S1                                             | 15.50167         | -1375.151               | 1406.155 | 0.983   |
| Constant (intercept)                              | -27.15596        | -1417.948               | 1363.636 | 0.969   |
| <b>Favorable sensory block level</b>              |                  |                         |          |         |
|                                                   | (Base outcome)   |                         |          |         |
| <b>Higher sensory block level</b>                 |                  |                         |          |         |
| Isobaric bupivacaine dose<br>(Each 1-mg increase) | .1364955         | -.0315812               | .3045721 | 0.111   |
| Male sex                                          | -.4004332        | -1.357776               | .5569093 | 0.412   |
| Age of the patient<br>(Each 1-year increase)      | .0274078         | -.0219869               | .0768024 | 0.277   |
| Height<br>(Each 1-cm increase)                    | .0212601         | -.0455438               | .088064  | 0.533   |
| Weight<br>(Each 1-kg increase)                    | .0151518         | -.0373299               | .0676335 | 0.571   |
| Injection level                                   |                  |                         |          |         |
| L2-L3                                             | Reference        |                         |          |         |
| L3-L4                                             | -.2188682        | -1.517257               | 1.079521 | 0.741   |
| L4-L5                                             | -.1969478        | -1.624356               | 1.23046  | 0.787   |
| L5-S1                                             | -25.38965        | -687154.6               | 687103.8 | 1.000   |
| Constant (intercept)                              | -9.22818         | -20.43689               | 1.980526 | 0.107   |
